# Supplementary material for: Construction of a selective non-enzymatic electrochemical sensor based on hollow nickel nanospheres/carbon dots–chitosan and molecularly imprinted polymer film for the detection of glucose
Source: Royal Society of Chemistry journal article supplement (doi:10.1039/d1nj03864h), 2021-01-01
Supplement: d1nj03864h1.pdf [file d1nj03864h1.pdf]

## Construction of a selective non-enzymatic electrochemical sensor based on hollow nickel nanospheres/carbon dots-chitosan and molecularly imprinted polymer film for the detection of glucose

Haiyan Wu<sup>a,b,&</sup>, Wei Zheng<sup>b,&</sup>, Yan Jiang<sup>c</sup>, Jicheng Xu<sup>c</sup>, Fengxian Qiu<sup>b,\*</sup>

- School of Chemical and Environmental Engineering, Jiangsu University of Technology, Changzhou 213001, China.
- School of Chemistry and Chemical Engineering, Jiangsu University, Zhenjiang 212013, China
- Institute of Chemistry and Materials Science, Zhenjiang College, Zhenjiang, 212028, China

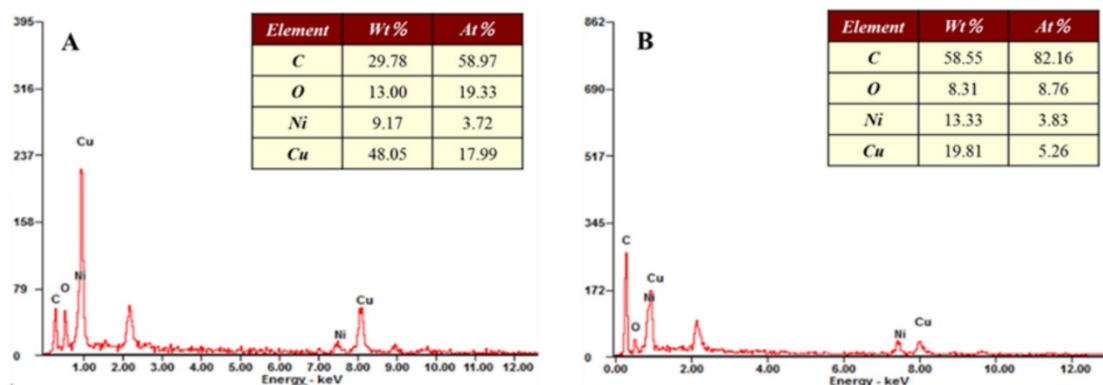

Fig. S1 EDX spectra of Ni-Cu alloy layer (A) and HNINS (B)

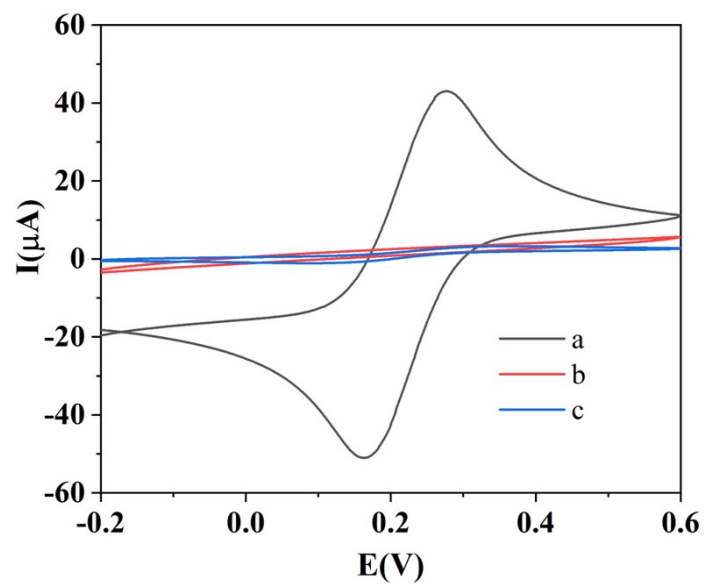

Fig. S2 CV curves of bare GCE (a), NIP before (b) and after elution (c)

Table S1 The Rct values of the modification of the electrode

| Modified electrode                                       | Rct ( $\Omega$ ) |
|----------------------------------------------------------|------------------|
| (a) Bare GCE                                             | 1050             |
| (b) HNiNS/GCE                                            | 128.9            |
| (c)HNiNS/CDs-CS/GCE                                      | 25.53            |
| (d)HNiNS/CDs-CS/MIP/GCE before the extraction of glucose | 18120            |
| (e) HNiNS/CDs-CS/MIP/GCE after extraction of glucose     | 523.3            |
| (f) HNiNS/CDs-CS/MIP/GCE after rebinding of glucose      | 8544             |
